# Supplementary material for: Breaking the myths of competition: a cross-sectional analysis of injuries among CrossFit trained participants
Source: PubMed Central journal article supplement — BMJ Open Sport Exerc Med. 2020 Jun 15;6(1):e000750. doi: 10.1136/bmjsem-2020-000750 (PMC7299042; doi:10.1136/bmjsem-2020-000750), 2020-06-15
Supplement: bmjsem-2020-000750supp001.pdf [file bmjsem-2020-000750supp001.pdf]

1 Supplementary Material

2 **Appendix A:** Incidence rate per 1000 workout hours by competition status, sex, age

3 group and workout frequency (days) (N = 3,049).

4

| Row Labels             | Lower Bound | Higher Bound | IR Mean     |
|------------------------|-------------|--------------|-------------|
| <b>Non-competitors</b> | <b>1.88</b> | <b>0.45</b>  | <b>1.17</b> |
| <b>Female</b>          | <b>1.78</b> | <b>0.42</b>  | <b>1.10</b> |
| < 3                    | 2.93        | 0.55         | 1.74        |
| < 25                   | 4.21        | 0.61         | 2.41        |
| 25-29                  | 1.36        | 0.28         | 0.82        |
| 30-34                  | 2.42        | 0.39         | 1.41        |
| 35-39                  | 4.29        | 0.87         | 2.58        |
| 40-44                  | 2.86        | 0.41         | 1.64        |
| 45-49                  | 3.61        | 0.65         | 2.13        |
| 50-54                  | 3.08        | 0.73         | 1.91        |
| ≥55                    | 1.57        | 0.46         | 1.02        |
| 3-5                    | 1.22        | 0.35         | 0.79        |
| < 25                   | 1.16        | 0.32         | 0.74        |
| 25-29                  | 1.73        | 0.51         | 1.12        |
| 30-34                  | 1.36        | 0.37         | 0.87        |
| 35-39                  | 1.09        | 0.34         | 0.72        |
| 40-44                  | 1.02        | 0.30         | 0.66        |
| 45-49                  | 1.06        | 0.30         | 0.68        |
| 50-54                  | 1.19        | 0.36         | 0.78        |
| ≥55                    | 1.12        | 0.33         | 0.73        |
| > 5                    | 1.20        | 0.36         | 0.78        |
| < 25                   | 1.15        | 0.39         | 0.77        |
| 25-29                  | 1.60        | 0.49         | 1.05        |
| 30-34                  | 1.37        | 0.40         | 0.89        |
| 35-39                  | 0.88        | 0.31         | 0.60        |
| 40-44                  | 1.75        | 0.44         | 1.10        |
| 45-49                  | 0.71        | 0.26         | 0.49        |
| 50-54                  | 0.17        | 0.06         | 0.12        |
| ≥55                    | 2.00        | 0.53         | 1.27        |
| <b>Male</b>            | <b>2.00</b> | <b>0.49</b>  | <b>1.24</b> |
| < 3                    | 4.11        | 0.73         | 2.42        |
| 25-29                  | 1.88        | 0.42         | 1.15        |
| 30-34                  | 9.70        | 1.19         | 5.45        |

|                    |             |             |             |
|--------------------|-------------|-------------|-------------|
| 35-39              | 1.97        | 0.47        | 1.22        |
| 40-44              | 4.71        | 0.81        | 2.76        |
| 50-54              | 3.27        | 0.69        | 1.98        |
| ≥55                | 3.13        | 0.82        | 1.98        |
| 3-5                | 1.31        | 0.39        | 0.85        |
| < 25               | 1.25        | 0.36        | 0.81        |
| 25-29              | 1.22        | 0.37        | 0.80        |
| 30-34              | 1.32        | 0.38        | 0.85        |
| 35-39              | 1.55        | 0.45        | 1.00        |
| 40-44              | 1.40        | 0.39        | 0.90        |
| 45-49              | 1.58        | 0.54        | 1.06        |
| 50-54              | 1.04        | 0.32        | 0.68        |
| ≥55                | 1.09        | 0.32        | 0.71        |
| > 5                | 1.10        | 0.40        | 0.75        |
| < 25               | 1.68        | 0.55        | 1.12        |
| 25-29              | 1.23        | 0.42        | 0.83        |
| 30-34              | 0.91        | 0.30        | 0.61        |
| 35-39              | 0.10        | 0.37        | 0.24        |
| 40-44              | 0.78        | 0.27        | 0.53        |
| 45-49              | 2.46        | 0.71        | 1.59        |
| 50-54              | 1.32        | 0.42        | 0.87        |
| ≥55                | 0.31        | 0.14        | 0.23        |
| <b>Competitors</b> | <b>1.13</b> | <b>0.32</b> | <b>0.72</b> |
| <b>Female</b>      | <b>1.13</b> | <b>0.31</b> | <b>0.72</b> |
| < 3                | 2.21        | 0.47        | 1.34        |
| 25-29              | 1.78        | 0.47        | 1.13        |
| 30-34              | 3.33        | 0.58        | 1.96        |
| 35-39              | 1.97        | 0.48        | 1.23        |
| 40-44              | 1.18        | 0.28        | 0.73        |
| 45-49              | 3.08        | 0.58        | 1.83        |
| 50-54              | 1.25        | 0.40        | 0.83        |
| ≥55                | 2.86        | 0.53        | 1.70        |
| 3-5                | 0.88        | 0.30        | 0.59        |
| < 25               | 2.29        | 0.63        | 1.46        |
| 25-29              | 0.51        | 0.18        | 0.35        |
| 30-34              | 0.60        | 0.21        | 0.41        |
| 35-39              | 0.67        | 0.25        | 0.46        |
| 40-44              | 0.70        | 0.24        | 0.47        |
| 45-49              | 0.85        | 0.31        | 0.58        |
| 50-54              | 0.82        | 0.32        | 0.57        |

|                    |             |             |             |
|--------------------|-------------|-------------|-------------|
| ≥55                | 0.63        | 0.24        | 0.44        |
| > 5                | 0.42        | 0.18        | 0.30        |
| < 25               | 0.54        | 0.19        | 0.37        |
| 25-29              | 0.41        | 0.15        | 0.28        |
| 30-34              | 0.52        | 0.22        | 0.37        |
| 35-39              | 0.43        | 0.18        | 0.31        |
| 40-44              | 0.63        | 0.27        | 0.45        |
| 45-49              | 0.41        | 0.19        | 0.30        |
| 50-54              | 0.35        | 0.15        | 0.25        |
| ≥55                | 0.09        | 0.05        | 0.07        |
| <b>Male</b>        | <b>1.14</b> | <b>0.33</b> | <b>0.71</b> |
| < 3                | 3.38        | 0.68        | 1.72        |
| 25-29              | 3.33        | 0.64        | 1.99        |
| 30-34              | 0.00        | 0.30        | 0.30        |
| 35-39              | 2.22        | 0.73        | 1.48        |
| 45-49              | 1.29        | 0.34        | 0.82        |
| ≥55                | 6.67        | 1.37        | 4.02        |
| 3-5                | 0.79        | 0.28        | 0.53        |
| < 25               | 1.31        | 0.38        | 0.85        |
| 25-29              | 0.56        | 0.21        | 0.39        |
| 30-34              | 0.69        | 0.26        | 0.48        |
| 35-39              | 0.67        | 0.25        | 0.46        |
| 40-44              | 0.61        | 0.25        | 0.43        |
| 45-49              | 0.60        | 0.22        | 0.41        |
| 50-54              | 1.18        | 0.39        | 0.79        |
| ≥55                | 0.68        | 0.26        | 0.47        |
| > 5                | 0.37        | 0.16        | 0.27        |
| < 25               | 0.37        | 0.14        | 0.26        |
| 25-29              | 0.34        | 0.15        | 0.25        |
| 30-34              | 0.43        | 0.18        | 0.31        |
| 35-39              | 0.31        | 0.14        | 0.23        |
| 40-44              | 0.37        | 0.17        | 0.27        |
| 45-49              | 0.47        | 0.22        | 0.35        |
| 50-54              | 0.16        | 0.08        | 0.12        |
| ≥55                | 0.49        | 0.23        | 0.36        |
| <b>Grand Total</b> | <b>1.52</b> | <b>0.39</b> | <b>0.95</b> |

6 **Table S1:** Sensitivity Analysis related to (A) Length of participation, (B) number of weekly workouts, and (C) number of  
7 workouts per week

|                                             | A    |        |      | B    |        |      | C    |        |      |
|---------------------------------------------|------|--------|------|------|--------|------|------|--------|------|
|                                             | OR   | 95% CI |      | OR   | 95% CI |      | OR   | 95% CI |      |
| (Intercept)                                 | 4.73 | 2.63   | 8.52 | 5.67 | 2.9    | 11.0 | 4.92 | 2.77   | 8.77 |
| Age (years)                                 | 0.99 | 0.98   | 1.00 | 0.99 | 1.00   | 1.00 | 0.99 | 0.98   | 1.00 |
| Male (vs. Female)                           | 0.91 | 0.78   | 1.07 | 0.92 | 0.8    | 1.07 | 0.92 | 0.78   | 1.08 |
| BMI                                         | 0.99 | 0.98   | 1.01 | 0.99 | 1.00   | 1.01 | 0.99 | 0.98   | 1.01 |
| Trains at a CrossFit affiliate (Yes vs. No) | 0.84 | 0.64   | 1.09 | 0.84 | 0.6    | 1.09 | 0.83 | 0.64   | 1.08 |
| Competition (Yes vs. No)                    | 1.06 | 0.89   | 1.28 | 1.14 | 1.00   | 1.34 | 1.13 | 0.96   | 1.33 |
| Participation Group (ref > 3 years)         |      |        |      |      |        |      |      |        |      |
| < 1 years                                   | 1.25 | 0.98   | 1.61 |      |        |      |      |        |      |
| 1 – 3 years                                 | 0.94 | 0.78   | 1.12 |      |        |      |      |        |      |
| 3 > years                                   | 1.00 |        |      |      |        |      |      |        |      |
| Workouts per week (ref +10 workouts)        |      |        |      |      |        |      |      |        |      |
| 1 - 3 workouts per week                     |      |        |      | 0.98 | 0.60   | 1.49 |      |        |      |
| 4 - 6 workouts per week                     |      |        |      | 0.86 | 0.60   | 1.25 |      |        |      |
| 7 - 9 workouts per week                     |      |        |      | 0.84 | 0.60   | 1.28 |      |        |      |
| > 10 workouts per week                      |      |        |      | 1.00 |        |      |      |        |      |
| Training days per week (ref > 5 days)       |      |        |      |      |        |      |      |        |      |
| < 3                                         |      |        |      |      |        |      | 1.19 | 0.88   | 1.62 |
| 3 – 5                                       |      |        |      |      |        |      | 1.07 | 0.90   | 1.27 |
| > 5 days                                    |      |        |      |      |        |      | 1.00 |        |      |
| AIC                                         |      |        |      | 3744 |        |      | 3750 |        |      |

8 \* CI = confidence interval; OR = odds ratio; AIC = Akaike Information Criterion.
